# Supplementary material
Source: ML conference proceedings conference paper supplement (https://proceedings.neurips.cc/paper_files/paper/2022/hash/e87b1e06be8c3594c810e8991e77ea40-Abstract.html)
Supplement: Supplementary file 1 [file e87b1e06be8c3594c810e8991e77ea40-Supplemental-Conference.zip]

Archive with 1 entries (1 files):
- 3585_supp.pdf
